# Supplementary material for: The B-Subdomain of the Xenopus laevis XFIN KRAB-AB Domain Is Responsible for Its Weaker Transcriptional Repressor Activity Compared to Human ZNF10/Kox1
Source: PubMed Central journal article supplement (PMC3912051; doi:10.1371/journal.pone.0087609), 2014-02-03
Supplement: pone.0087609.s001.pdf [file pone.0087609.s001.pdf]

**A**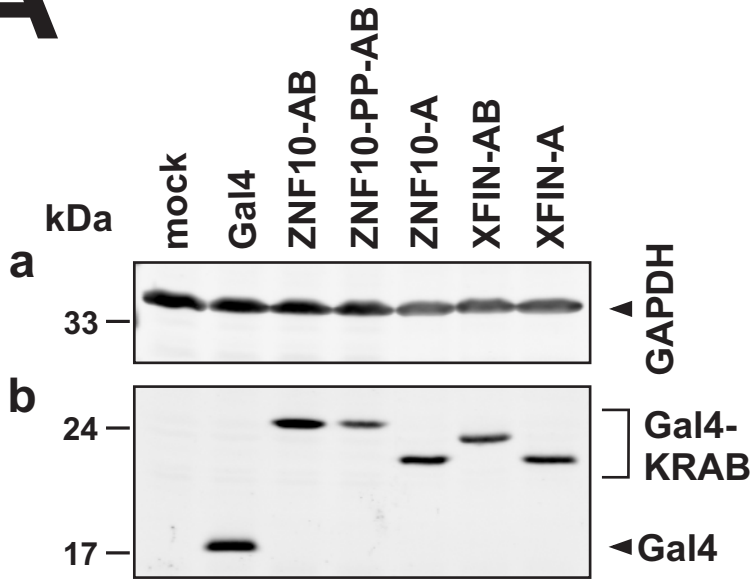**C** Relative normalized expression

| Construct   | Mean | SD   | p-value* |
|-------------|------|------|----------|
| Gal4        | 1    |      |          |
| ZNF10-AB    | 0.78 | 0.27 |          |
| ZNF10-PP-AB | 0.37 | 0.13 | 0.02     |
| ZNF10-A     | 0.78 | 0.26 | 0.94     |
| XFIN-AB     | 0.63 | 0.18 | 0.10     |
| XFIN-A      | 0.66 | 0.16 | 0.35     |

n = 4

**B**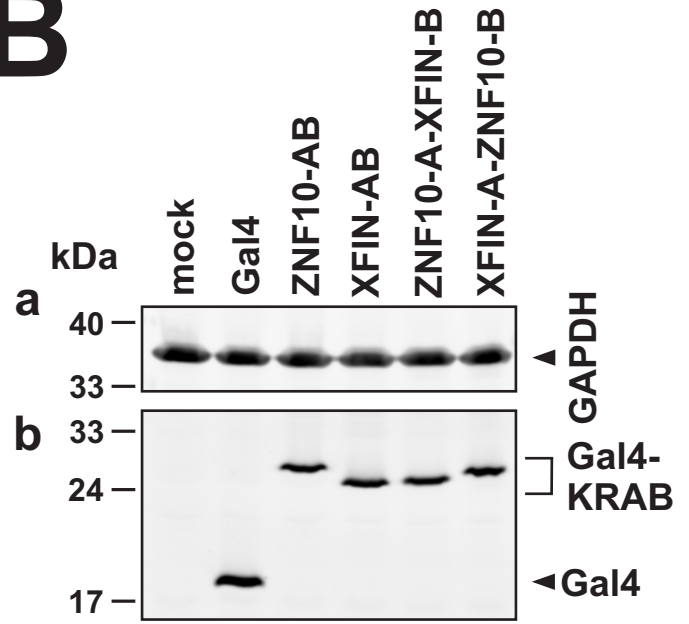**C** Relative normalized expression

| Construct      | Mean | SD   | p-value* |
|----------------|------|------|----------|
| Gal4           | 1    | 0    |          |
| ZNF10-AB       | 0.61 | 0.14 |          |
| XFIN-AB        | 0.56 | 0.09 | 0.57     |
| ZNF10-A-XFIN-B | 0.48 | 0.09 | 0.17     |
| XFIN-A-ZNF10-B | 0.52 | 0.15 | 0.25     |

n = 4

**C**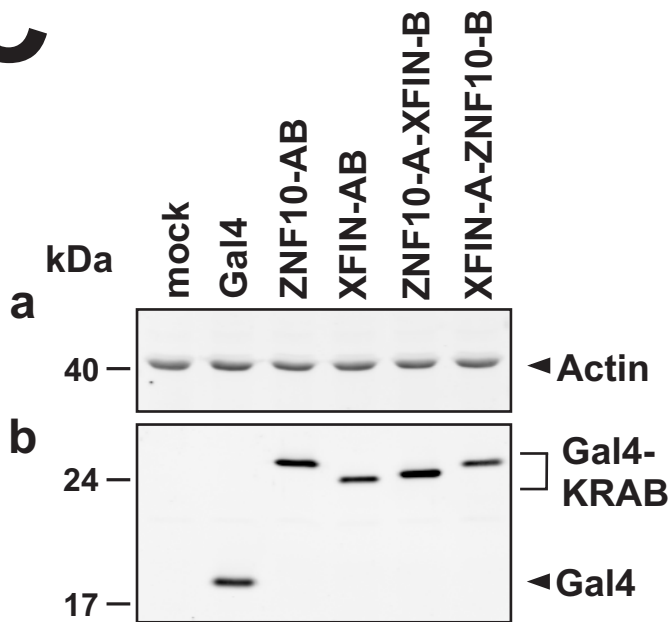**C** Relative normalized expression

| Construct      | Mean | SD   | p-value* |
|----------------|------|------|----------|
| Gal4           | 1    | 0    |          |
| ZNF10-AB       | 1.13 | 0.23 |          |
| XFIN-AB        | 0.61 | 0.22 | 0.001    |
| ZNF10-A-XFIN-B | 1.40 | 0.33 | 0.030    |
| XFIN-A-ZNF10-B | 0.61 | 0.20 | 0.005    |

n = 4
