# Supplementary material for: The B-Subdomain of the Xenopus laevis XFIN KRAB-AB Domain Is Responsible for Its Weaker Transcriptional Repressor Activity Compared to Human ZNF10/Kox1
Source: PubMed Central journal article supplement (PMC3912051; doi:10.1371/journal.pone.0087609), 2014-02-03
Supplement: pone.0087609.s002.pdf [file pone.0087609.s002.pdf]

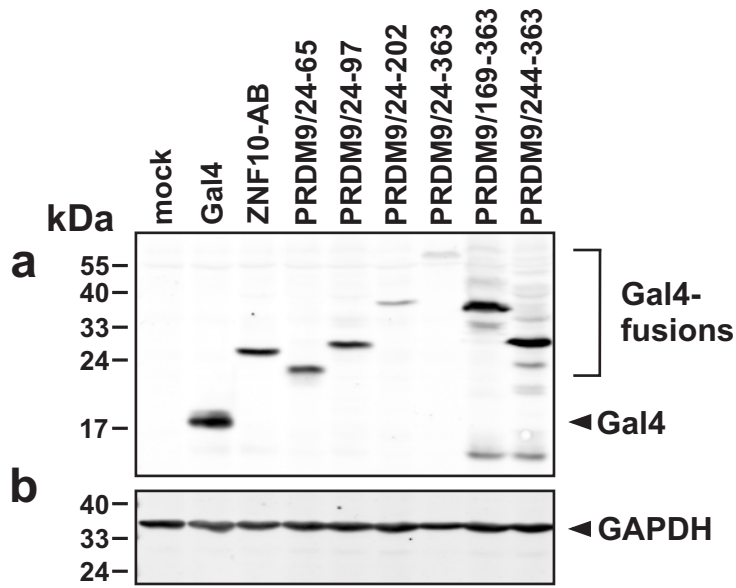

**c** Relative normalized expression

| Construct     | Mean | SD   | p-value * |
|---------------|------|------|-----------|
| Gal4          | 1.00 | 0.00 |           |
| ZNF10-AB      | 0.75 | 0.24 |           |
| PRDM9/24-65   | 0.40 | 0.07 | 0.08      |
| PRDM9/24-97   | 0.35 | 0.15 | 0.12      |
| PRDM9/24-202  | 0.21 | 0.11 | 0.03      |
| PRDM9/24-363  | 0.15 | 0.13 | 0.02      |
| PRDM9/169-363 | 0.67 | 0.26 | 0.68      |
| PRDM9/244-363 | 0.78 | 0.12 | 0.89      |

n = 4
