# Supplementary material for: The B-Subdomain of the Xenopus laevis XFIN KRAB-AB Domain Is Responsible for Its Weaker Transcriptional Repressor Activity Compared to Human ZNF10/Kox1
Source: PubMed Central journal article supplement (PMC3912051; doi:10.1371/journal.pone.0087609), 2014-02-03
Supplement: pone.0087609.s004.pdf [file pone.0087609.s004.pdf]

**A**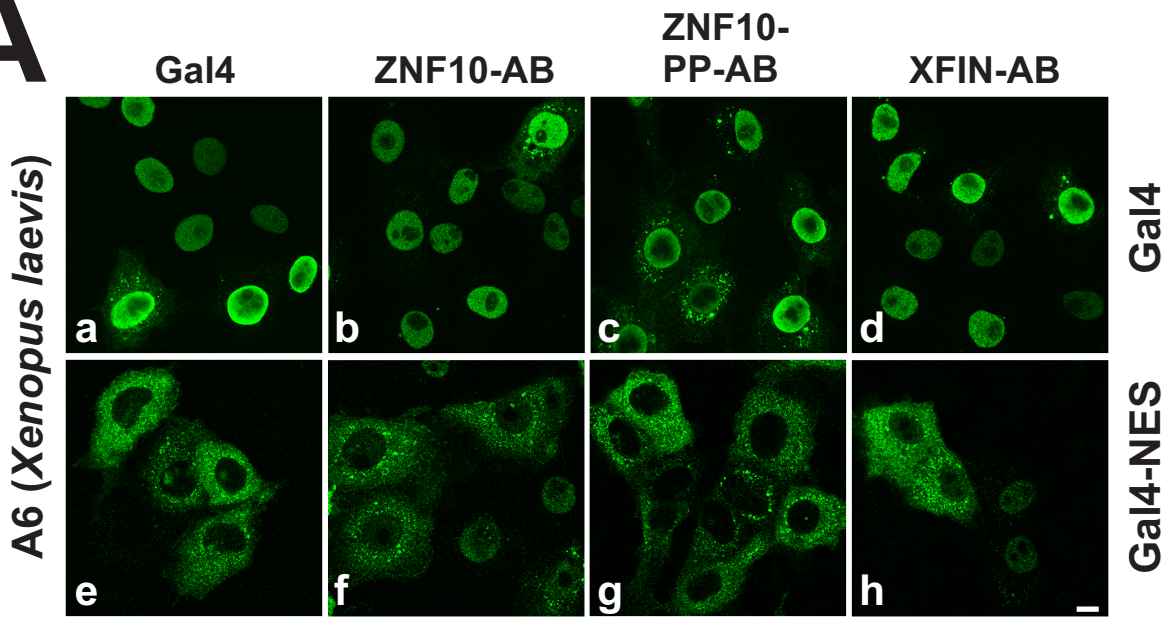**B**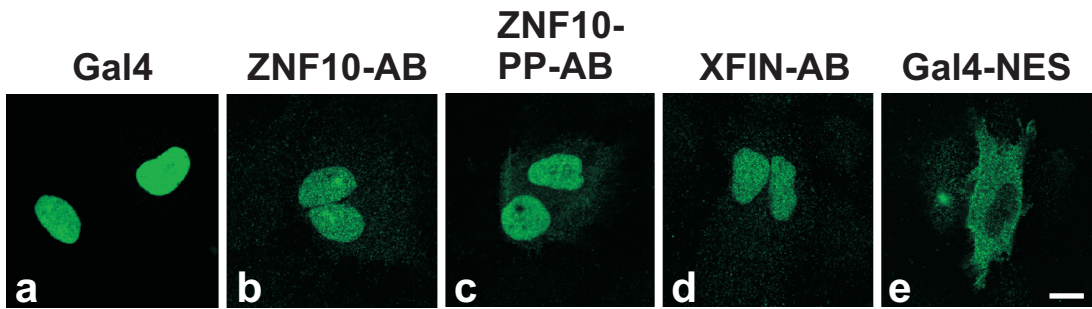

EPC (*Pimephales promelas*)
